# Supplementary material
Source: PubMed Central journal article supplement (PMC5566053)
Supplement: 2017_165399-Disclosures_and_Contributions.pdf [file 2017_165399-Disclosures_and_Contributions.pdf]

Haematologica  
HAEMATOL/2017/165399  
Version 3

Salvage use of allogeneic HSCT after reduced intensity conditioning from unrelated donors in multiple myeloma. A study by the Plasma Cell Disorders subcommittee of the EBMT Chronic Malignancies Working Party

Mohamad Sobh, Mauricette Michallet, Valerie Dubois, Simona Iacobelli, Linda Koster, Anja Van Biezen, Nathalie Fegueux, Reza Tabrizi, Jürgen Finke, Jean El-Cheikh, Martin Schipperus, Ellen Meijer, Peter von dem Borne, Eefke Petersen, Nigel Russell, Eleni Tholouli, Jakob Passweg, Frédéric Garban, Johan Maertens, Patrice Chevalier, Natacha Maillard, Liisa Volin, Sylvie Francois, Bruno Lioure, Yves Beguin, Eliane Gluckman, Annalisa Ruggeri, Laurent Garderet, and Nicolaus Kröger

Disclosures: Nothing to declare

Contributions: MS and MM designed the study. MS and SI performed statistical analysis; LK and AVB collected and verified data; VD classified HLA data, All other coauthors contributed to patients enrollment in this study and approval of final report. MS and NK wrote the manuscript.
